# Supplementary material for: Suppression of intrahepatic cholangiocarcinoma cell growth by SKI via upregulation of the CDK inhibitor p21
Source: PubMed Central journal article supplement (PMC9714377; doi:10.1002/2211-5463.13489), 2022-09-26
Supplement: FEB4-12-2122-s004.pdf [file FEB4-12-2122-s004.pdf]

**A**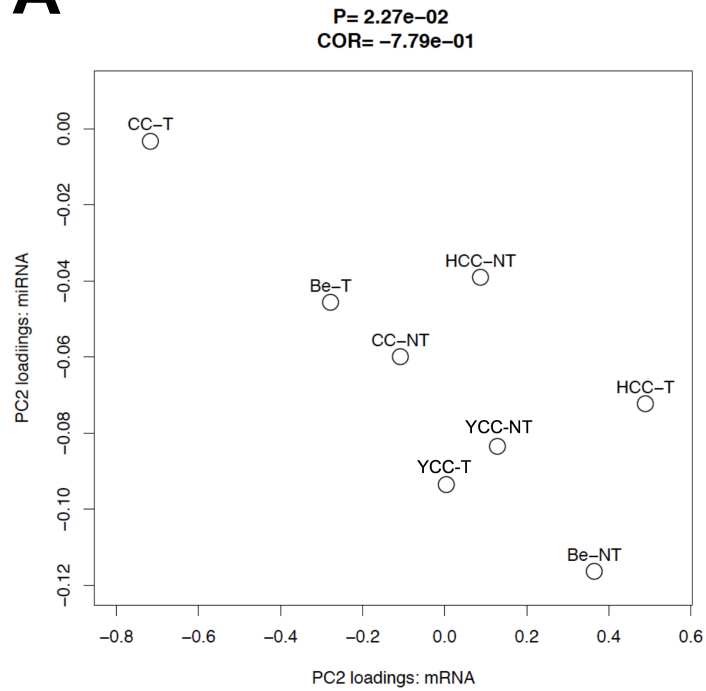**B**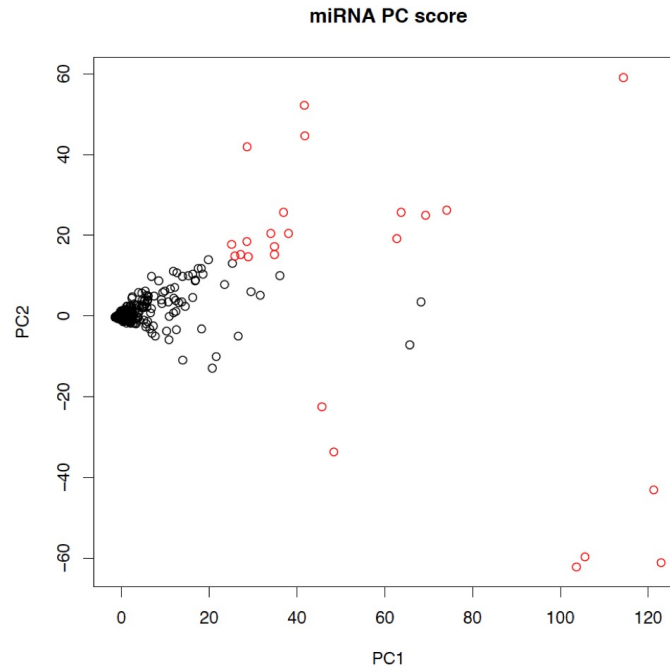**C**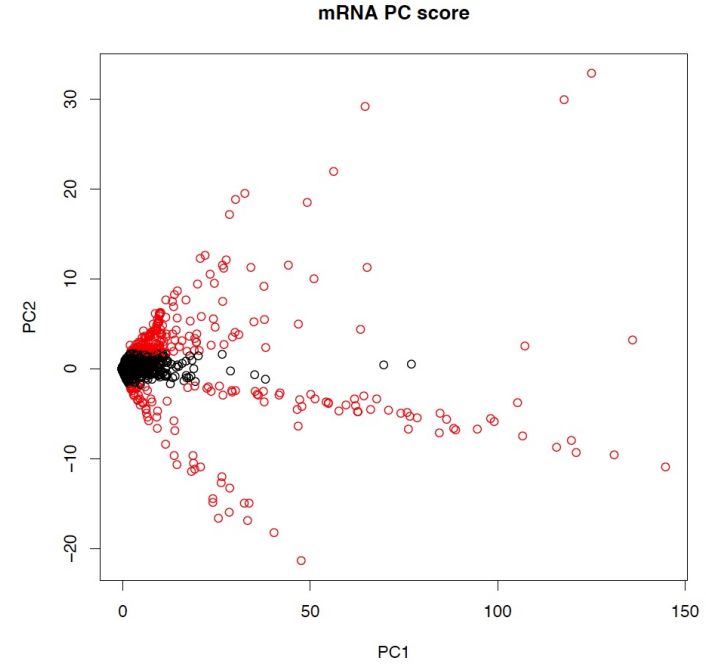

**Fig. S2.** Principal component (PC) analysis of tissue microRNA (miRNA) and mRNA datasets discriminates between hepatobiliary tumor types. (A) The axes of two PC2s with a negative correlation between the expression patterns of mRNAs and miRNAs in a two-dimensional model. CC, cholangiocarcinoma; YCC, cholangiocarcinoma of young individuals (younger than 50 years old); HCC, hepatocellular carcinoma; Be, benign hepatobiliary tumor; T, tumor; NT, non-tumor; (B) Red circles indicate significant miRNAs ( $n = 24$ ) and (C) mRNAs ( $n = 141$ ), using an adjusted  $P < 0.01$ , according to comparisons among tumor groups in a two-dimensional PC plot.
